# Supplementary material for: Electrical Storm Secondary to Amiodarone-Related Torsades de Pointes Following PCI for Acute Myocardial Infarction: A Case Report
Source: Research Square preprint supplement (doi:10.21203/rs.3.rs-8539511/v1), 2026-02-04
Supplement: Supplementary file 1 [file 15cbf9d635e8afc33f4a8d45.docx]

Table1 Summary of Laboratory Findings on Admission

| **Parameter** | **Adult Reference Range** | **Admission Value** |
| --- | --- | --- |
| White blood cell count (×10⁹/L) | 3.5-9.5 | 11.62 |
| Neutrophil proportion | 0.40-9.5 | 0.771 |
| Hemoglobin (g/L) | 115-150 | 116 |
| Cardiac troponin I (ng/mL) | ＜0.01 | 11.27 |
| Creatine kinase-MB (ng/mL) | ＜5.00 | 69.64 |
| Myoglobin (ng/mL) | ＜70 | ＞600 |
| D-dimer (mg/L) | ＜0.5 | 1.45 |
| NTpro-BNP（ng/ml） | ＜300 | 5052 |
| Creatinine (μmol/L) | 41-81 | 89 |
| Potassium (mmol/L) | 3.5-5.3 | 3.07 |
| AST（U/L） | 7-40 | 15 |
| ALT（U/L） | 13-35 | 75 |
| Total cholesterol (mmol/L) | 3.6-5.69 | 8.61 |
| Triglycerides (mmol/L) | 0.33-1.7 | 1.42 |
| High-density lipoprotein (mmol/L) | 0.91-1.95 | 1.29 |
| Low-density lipoprotein (mmol/L) | - | 5.43 |
| Fasting blood glucose (mmol/L) | 3.9-6.1 | 10.32 |
| 2-hour postprandial blood glucose (mmol/L) | 3.89-7.8 | 12.09 |
| Glycated hemoglobin (%) | 4.2-6.2 | 7.7 |
| Arterial blood gas analysis |  |  |
| PH | 7.25-7.45 | 7.505 |
| PCO2(mmHg) | 32-45 | 29.3 |
| PO2（mmHg） | 80-100 | 58.1 |
